# Supplementary material
Source: PubMed Central journal article supplement (PMC4201355)
Supplement: jo501839x_si_001.pdf [file jo501839x_si_001.pdf]

## Supporting Information

### Asymmetric Synthesis of a CBI-Based Cyclic *N*-Acyl *O*-Amino Phenol Duocarmycin Prodrug

Mika Uematsu and Dale L. Boger\*

*Department of Chemistry and The Skaggs Institute for Chemical Biology, The  
Scripps Research Institute, 10550 N. Torrey Pines Road, La Jolla, California  
92037, United States*

#### Contents

|                                                |             |
|------------------------------------------------|-------------|
| <sup>1</sup> H and <sup>13</sup> C NMR Spectra | page S1-S16 |
| <b>Figure S1.</b> Enantiopurity of <b>14</b>   | page S17    |

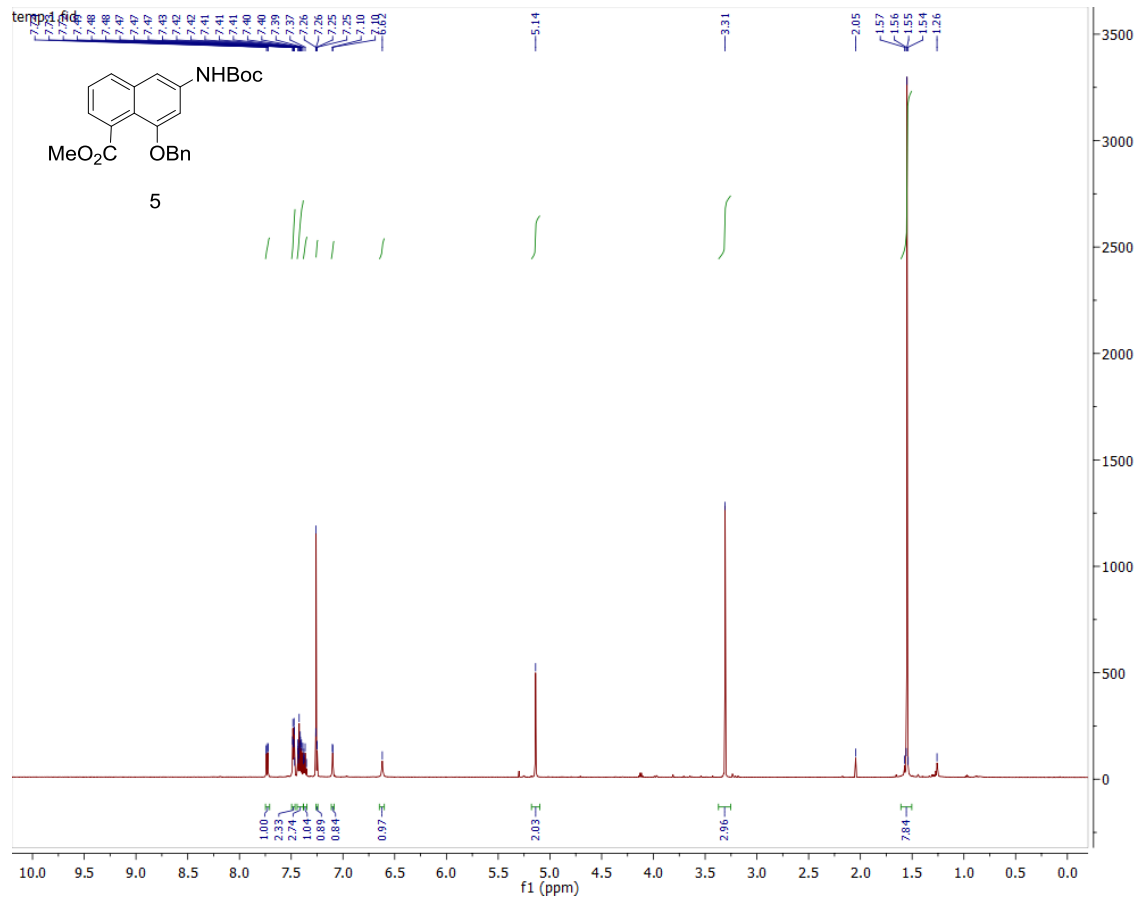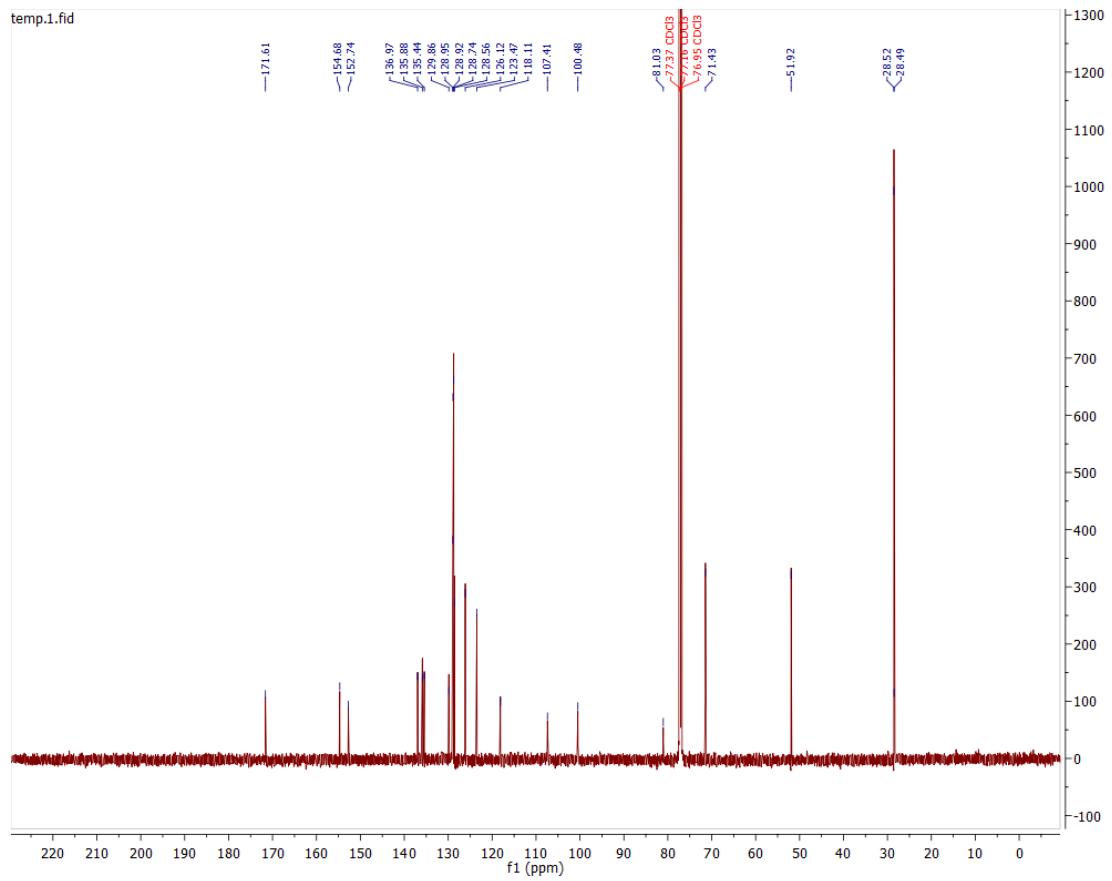

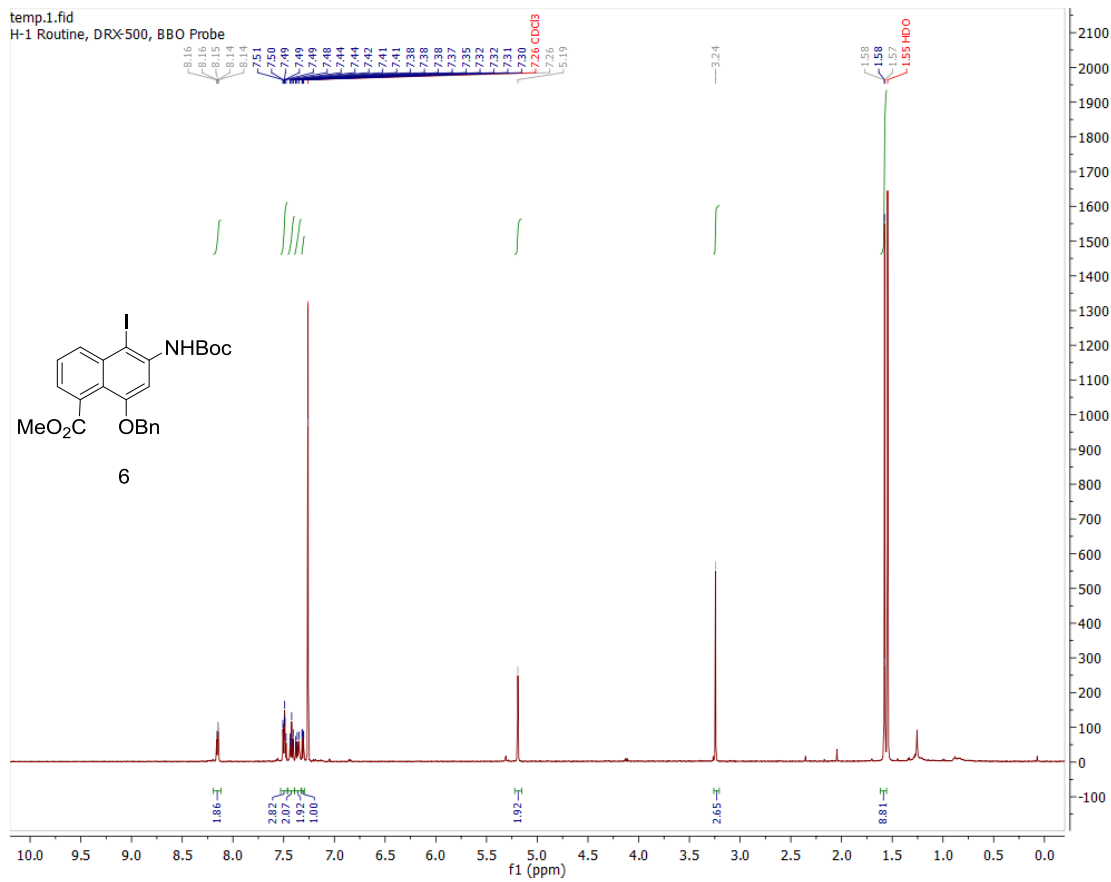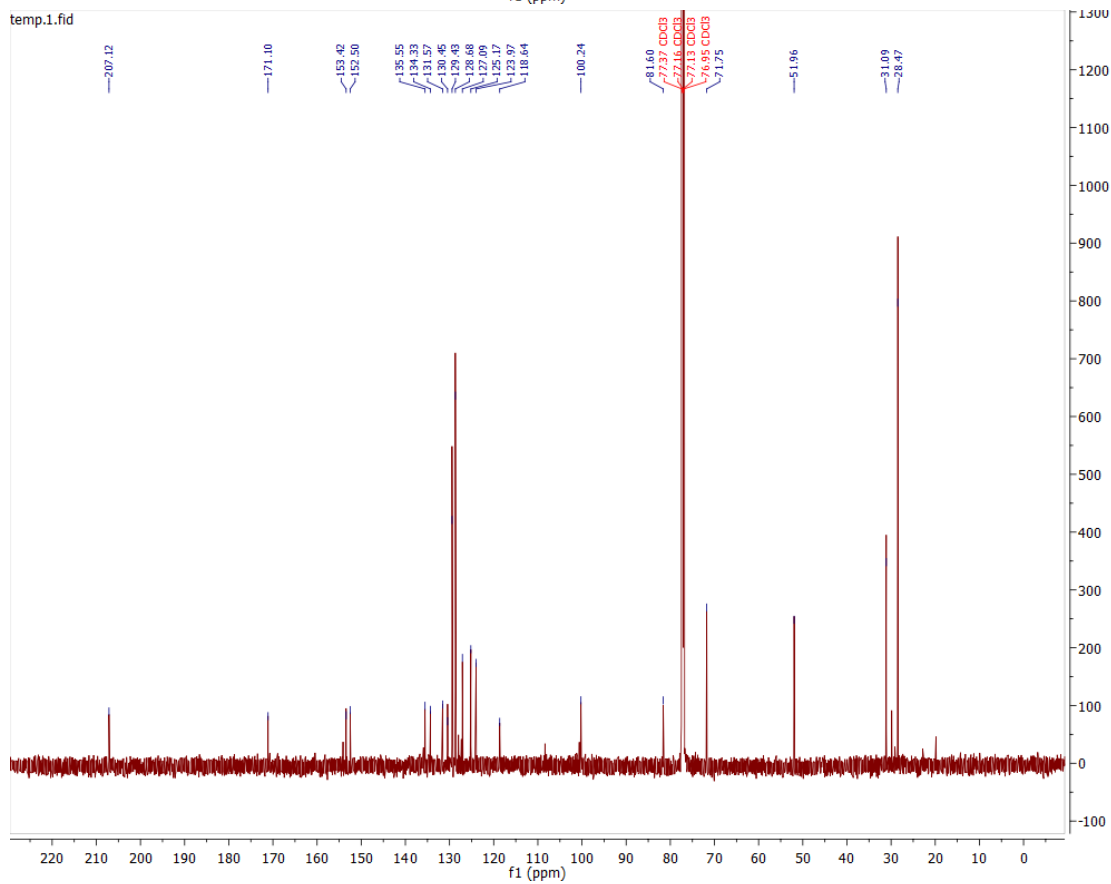

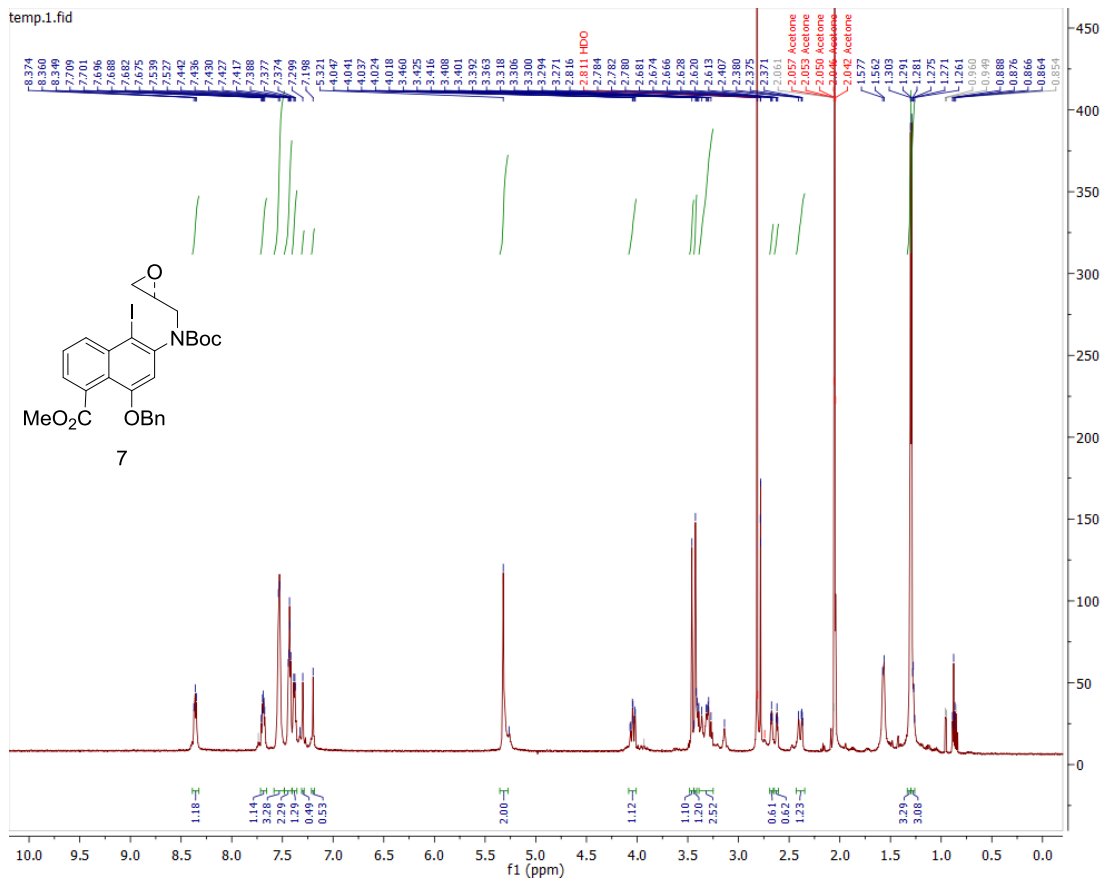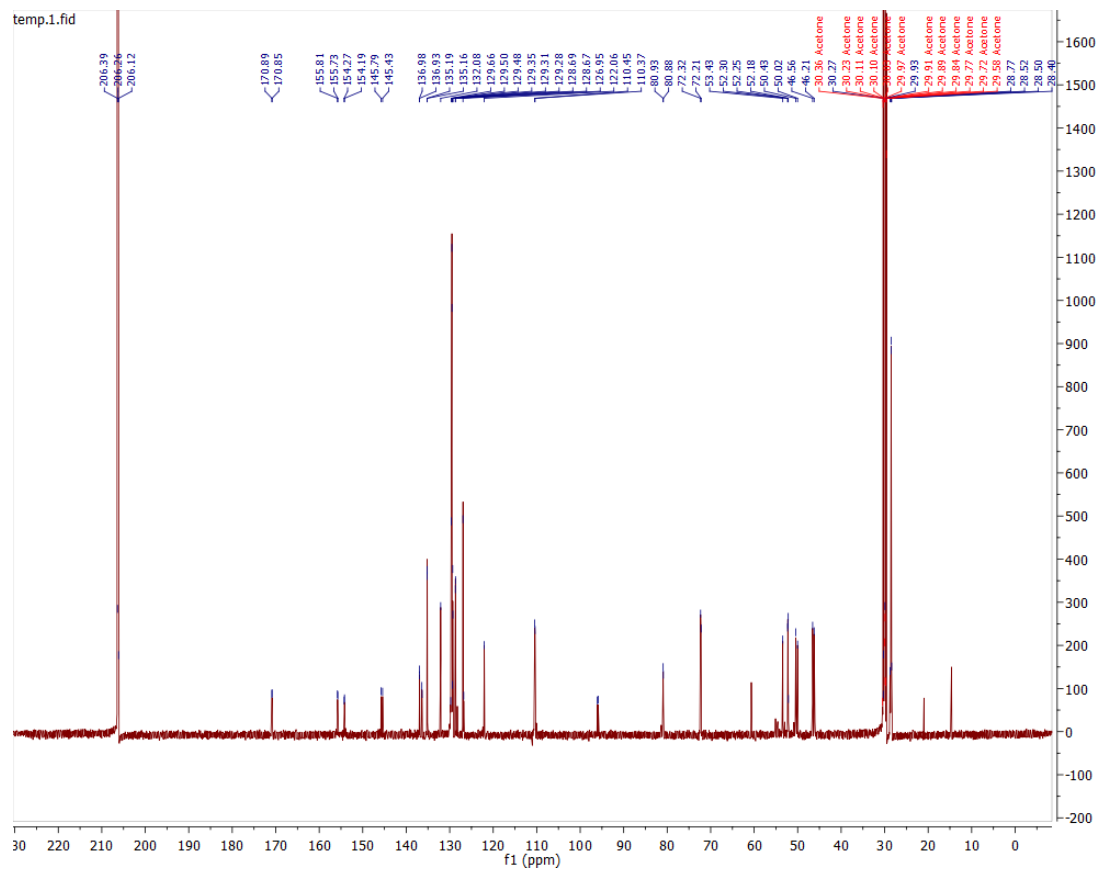

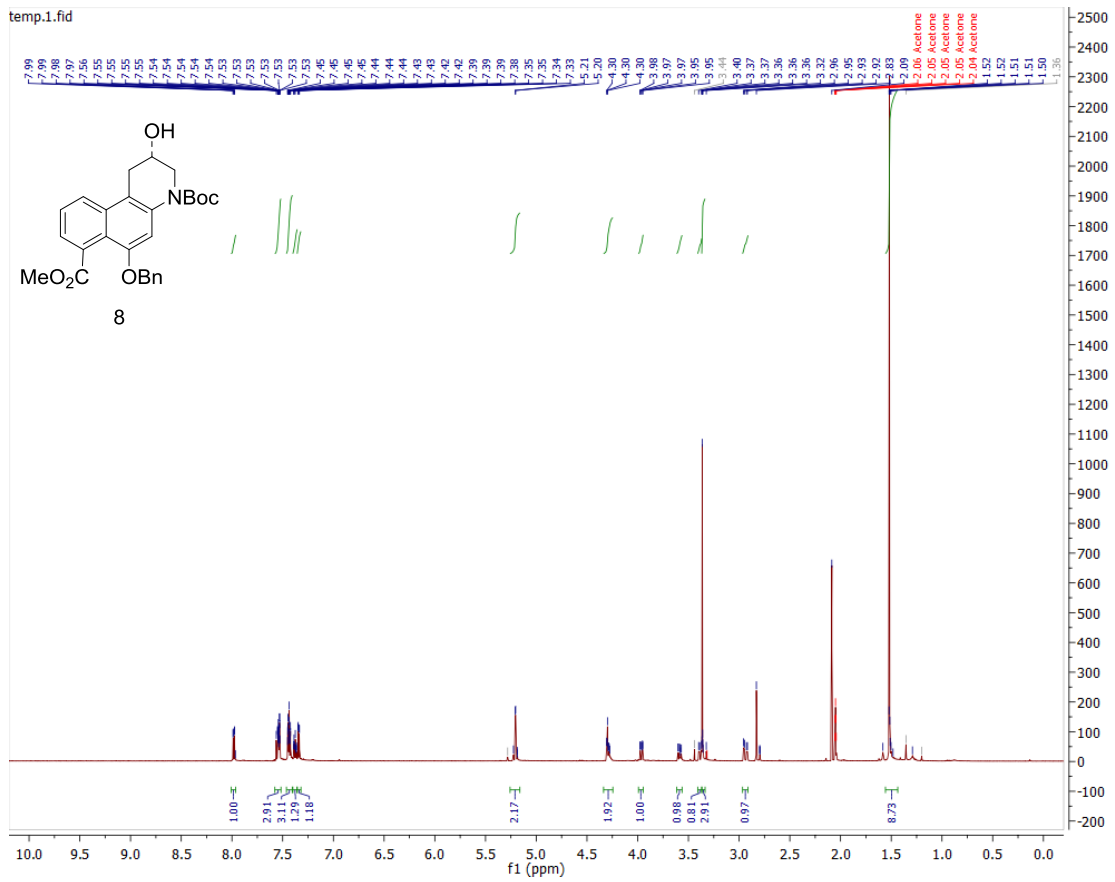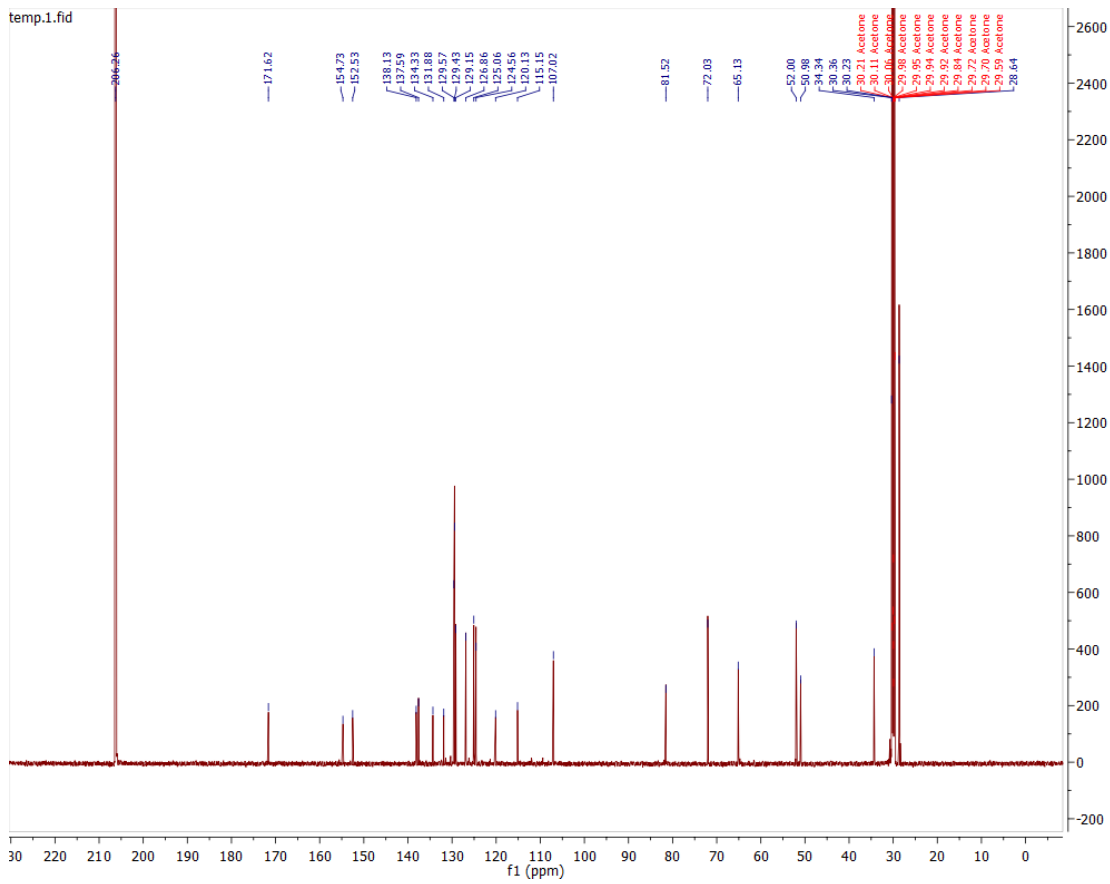

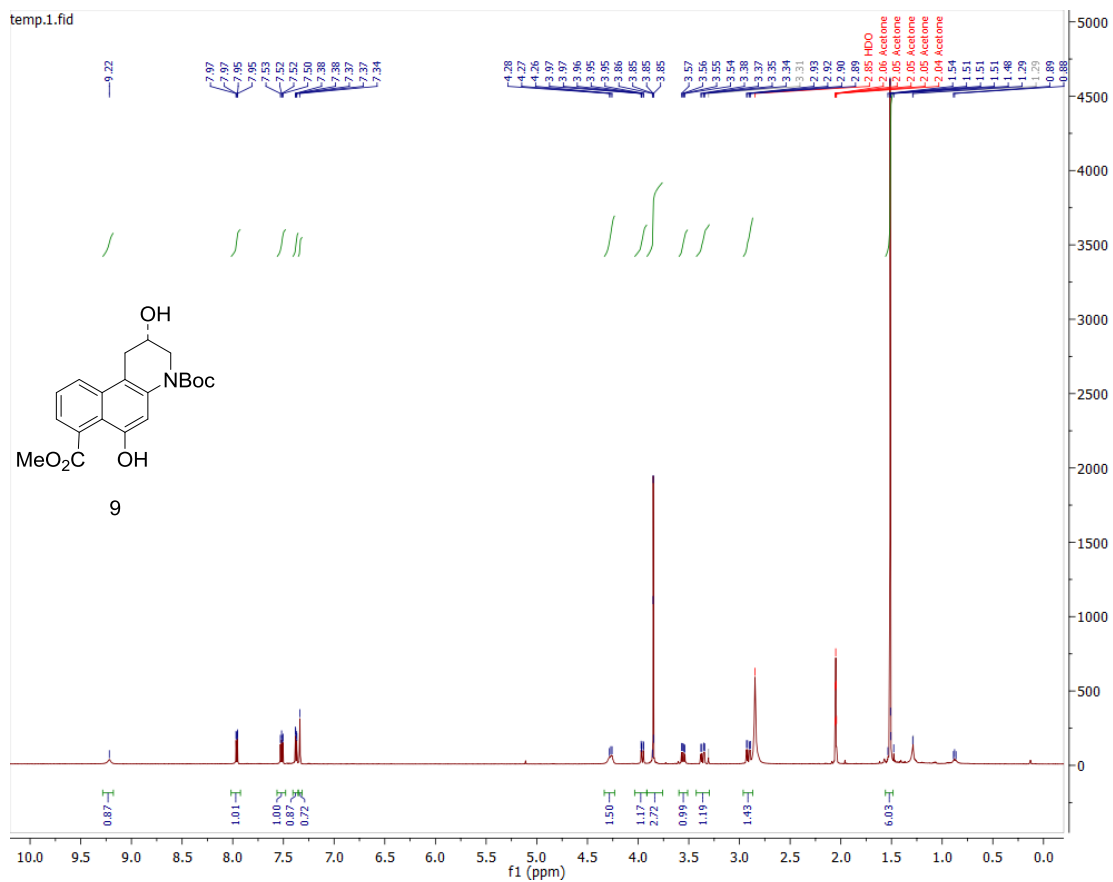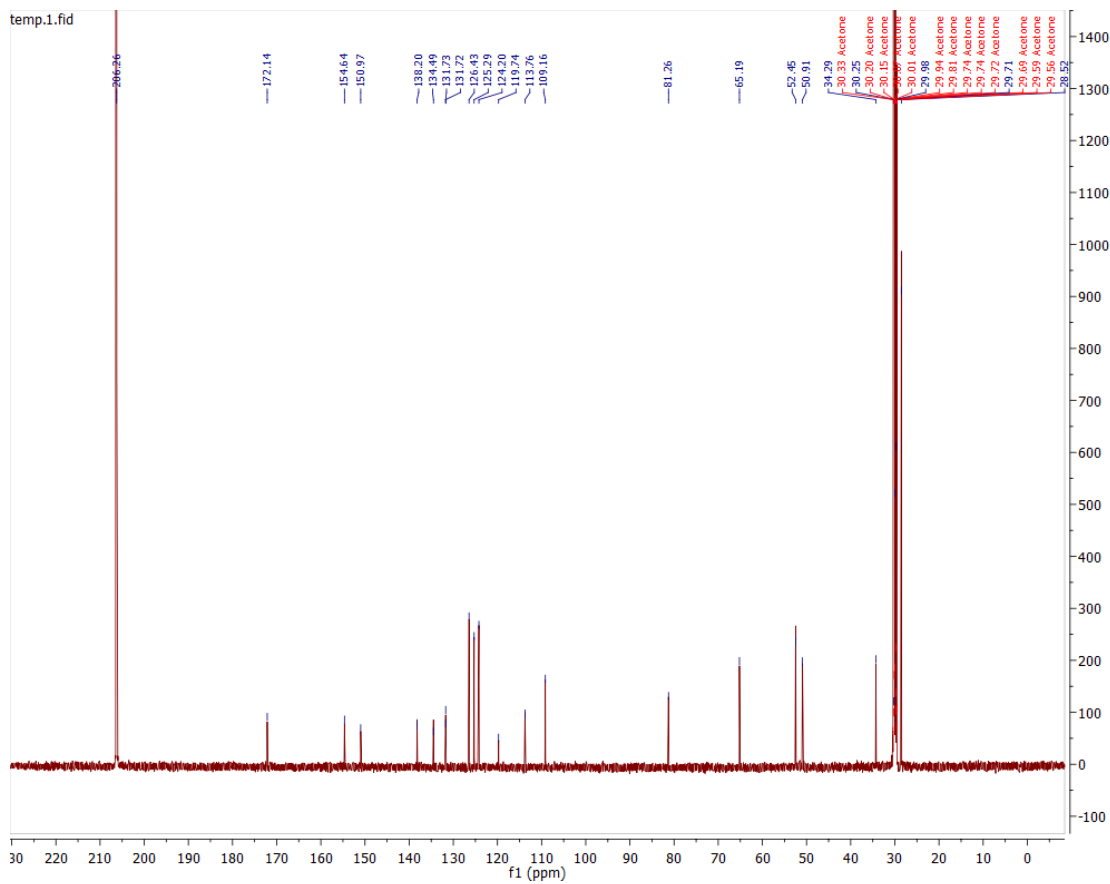

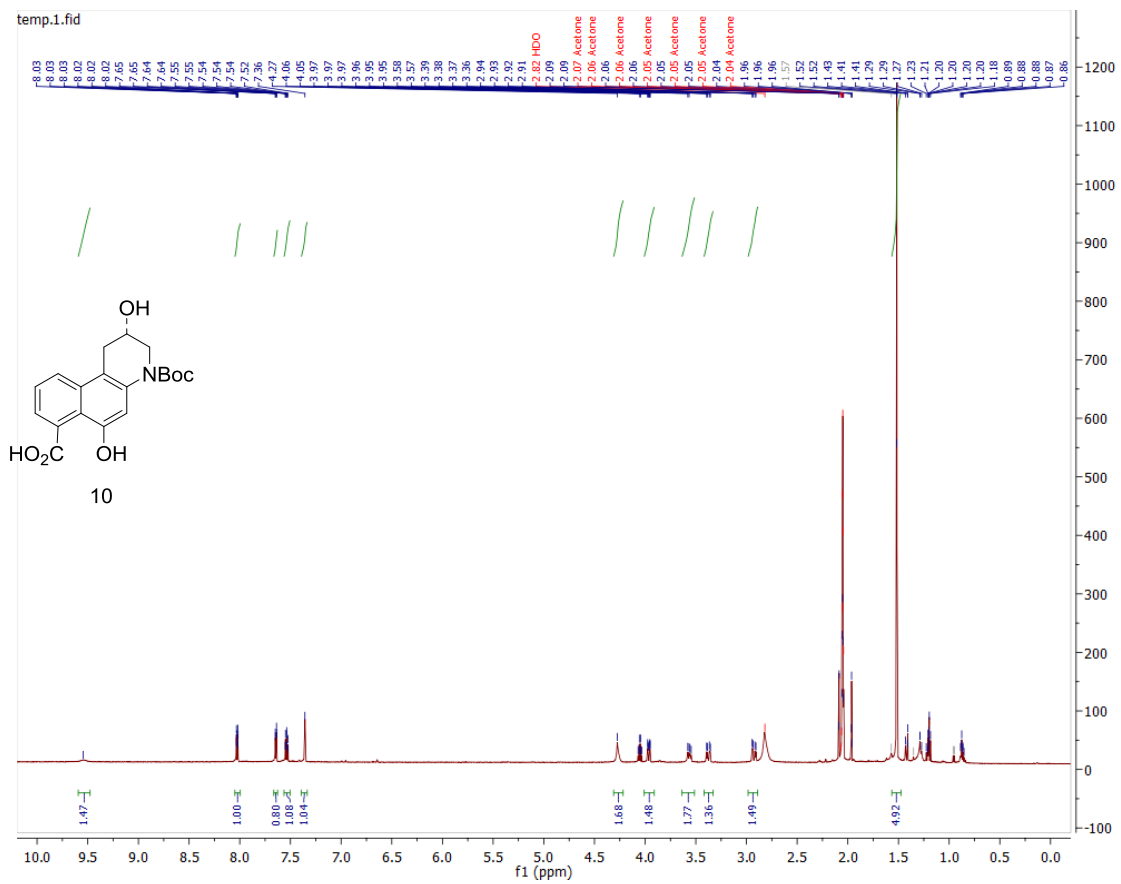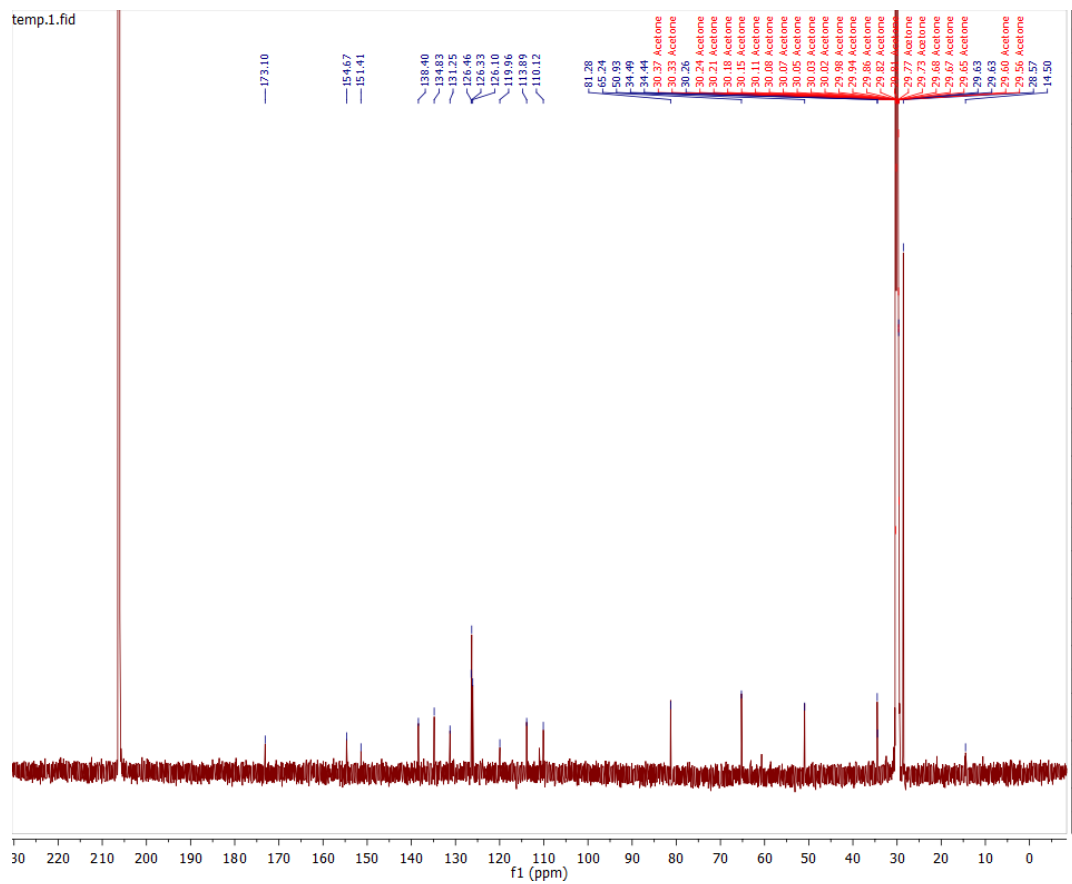

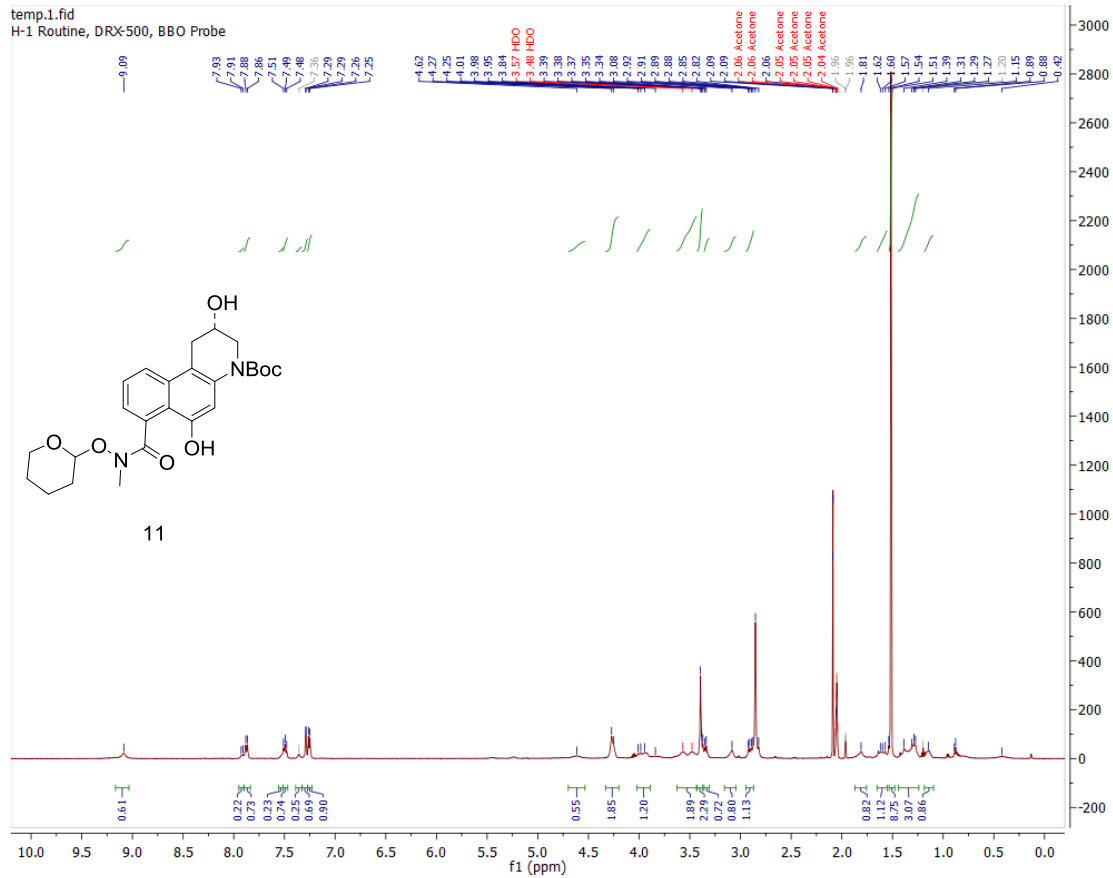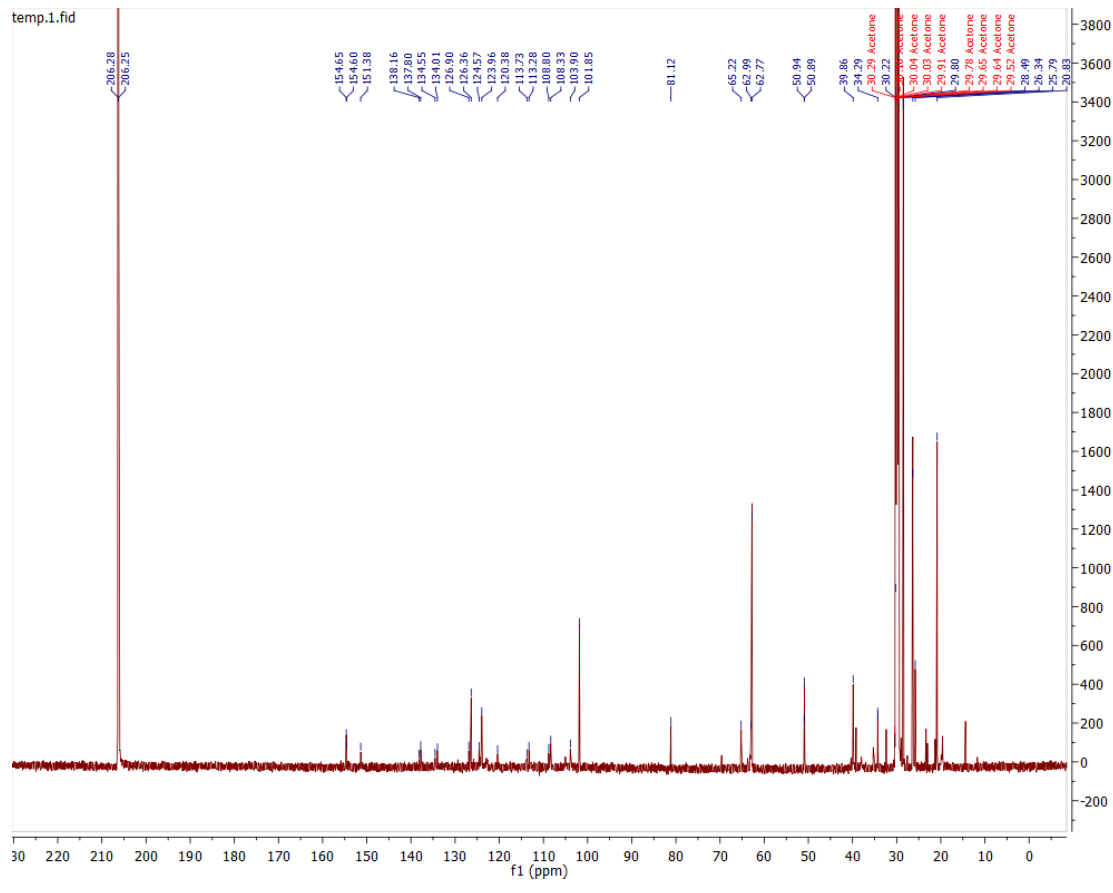



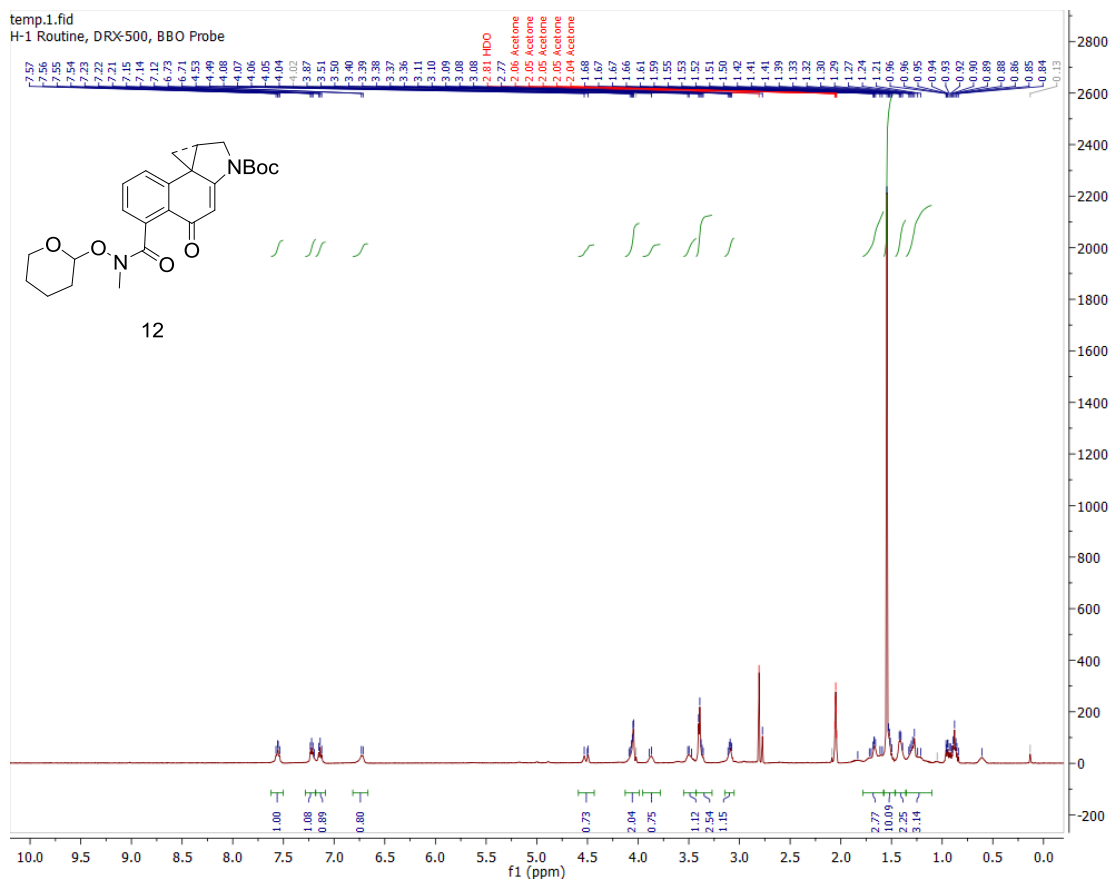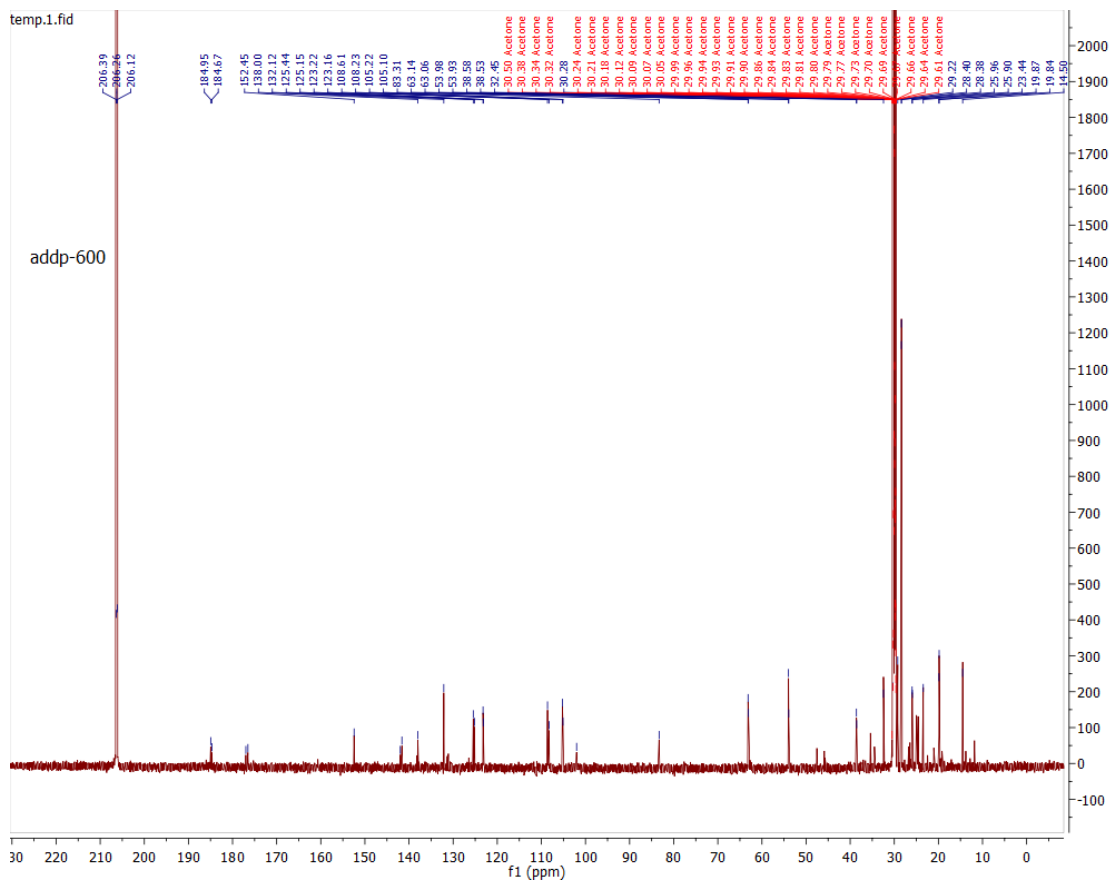

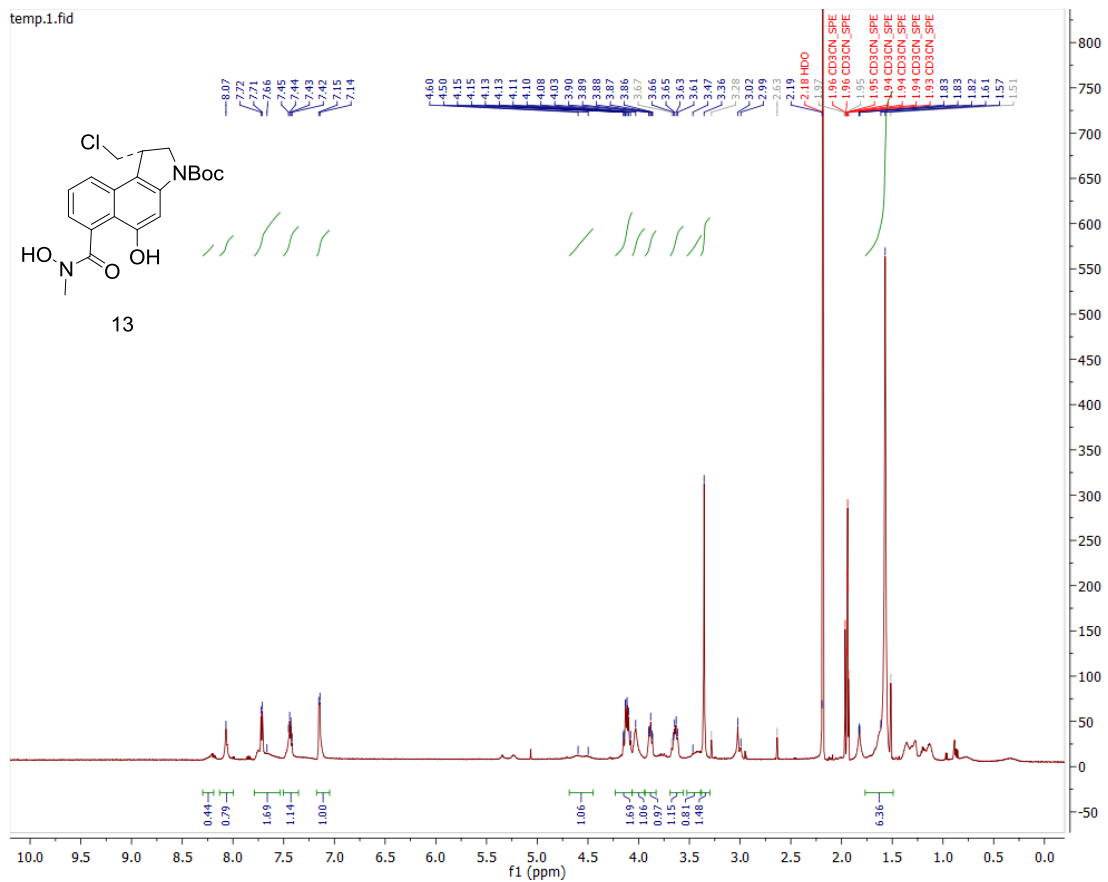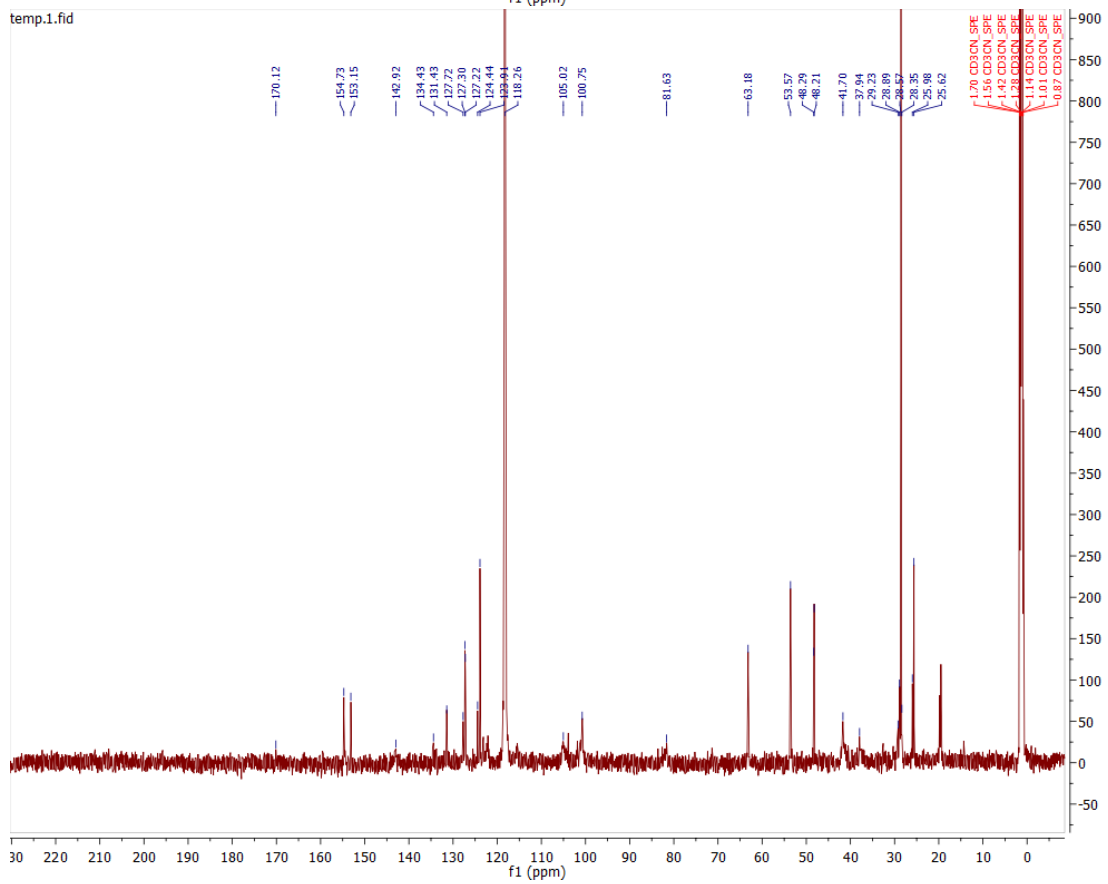

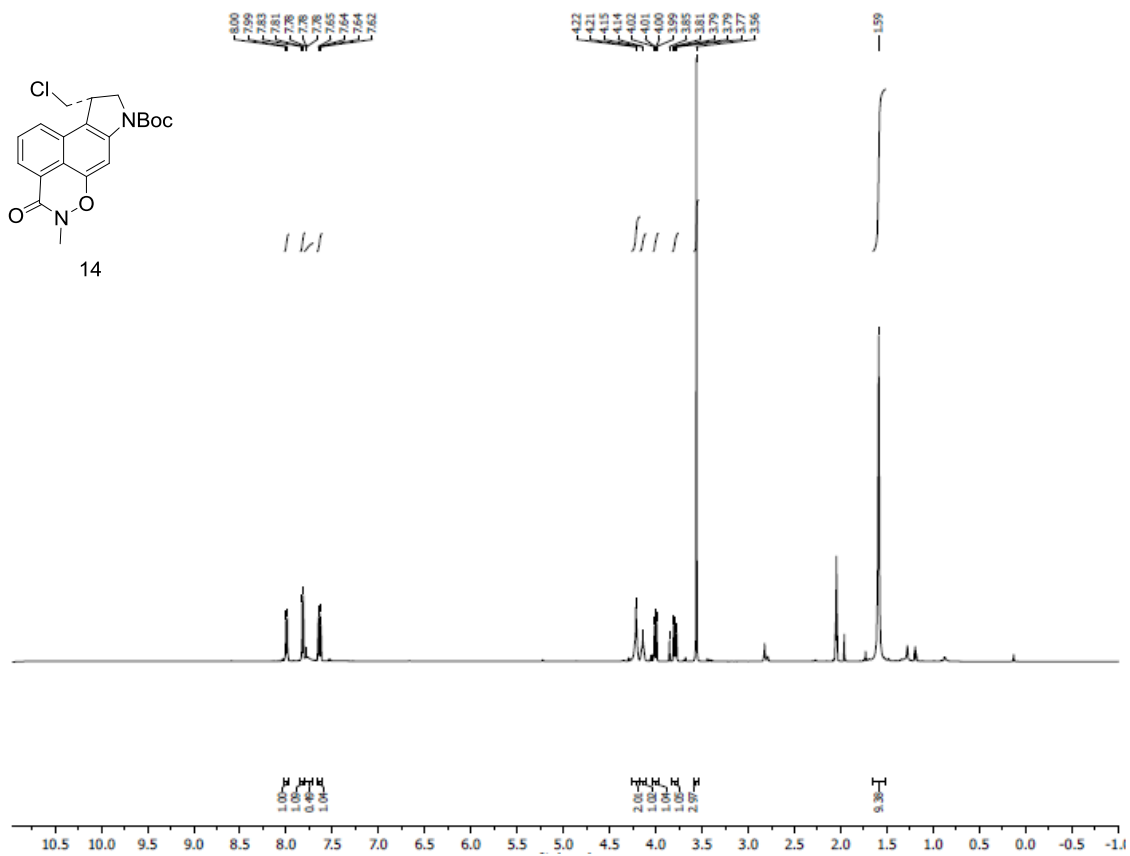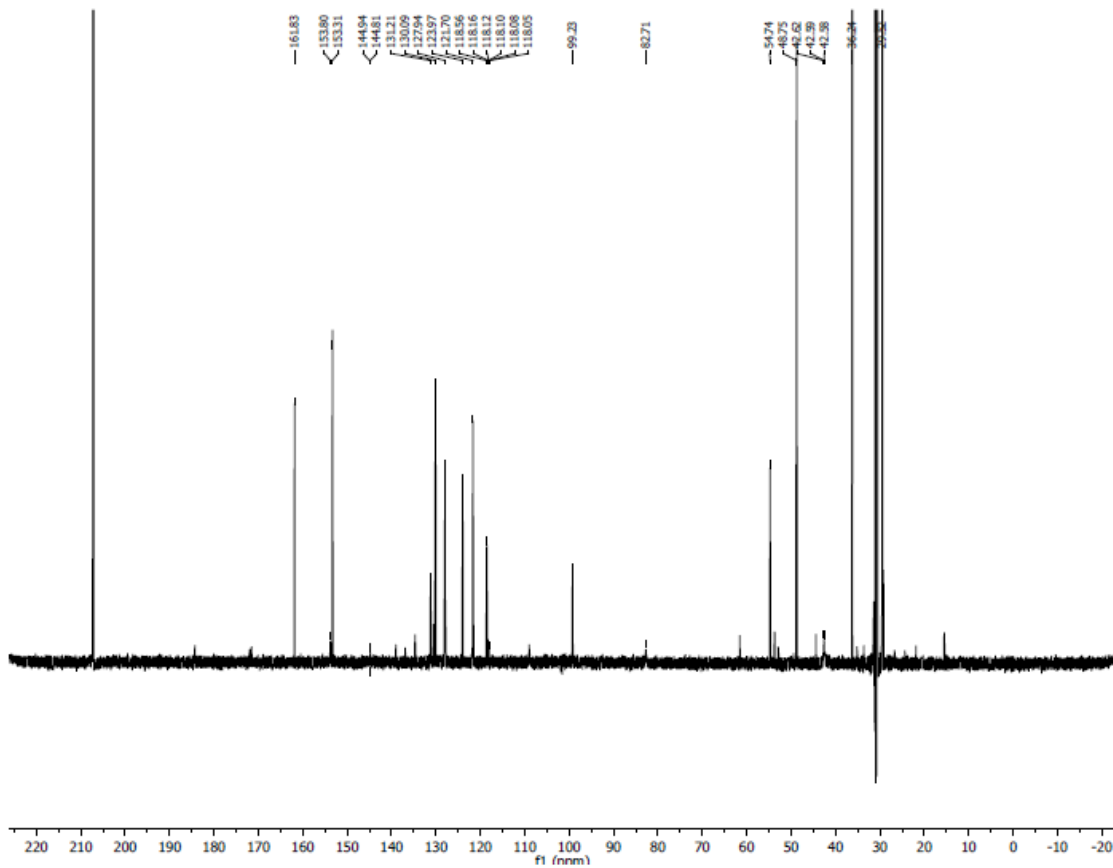



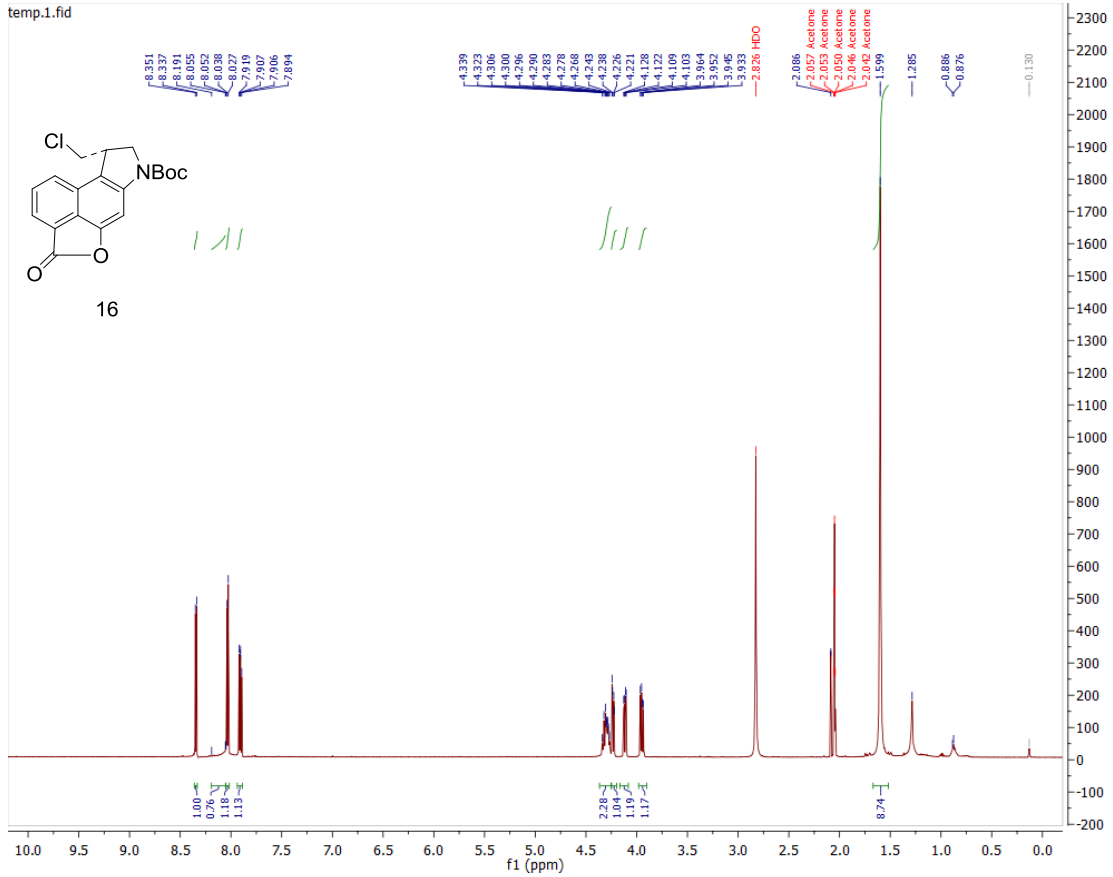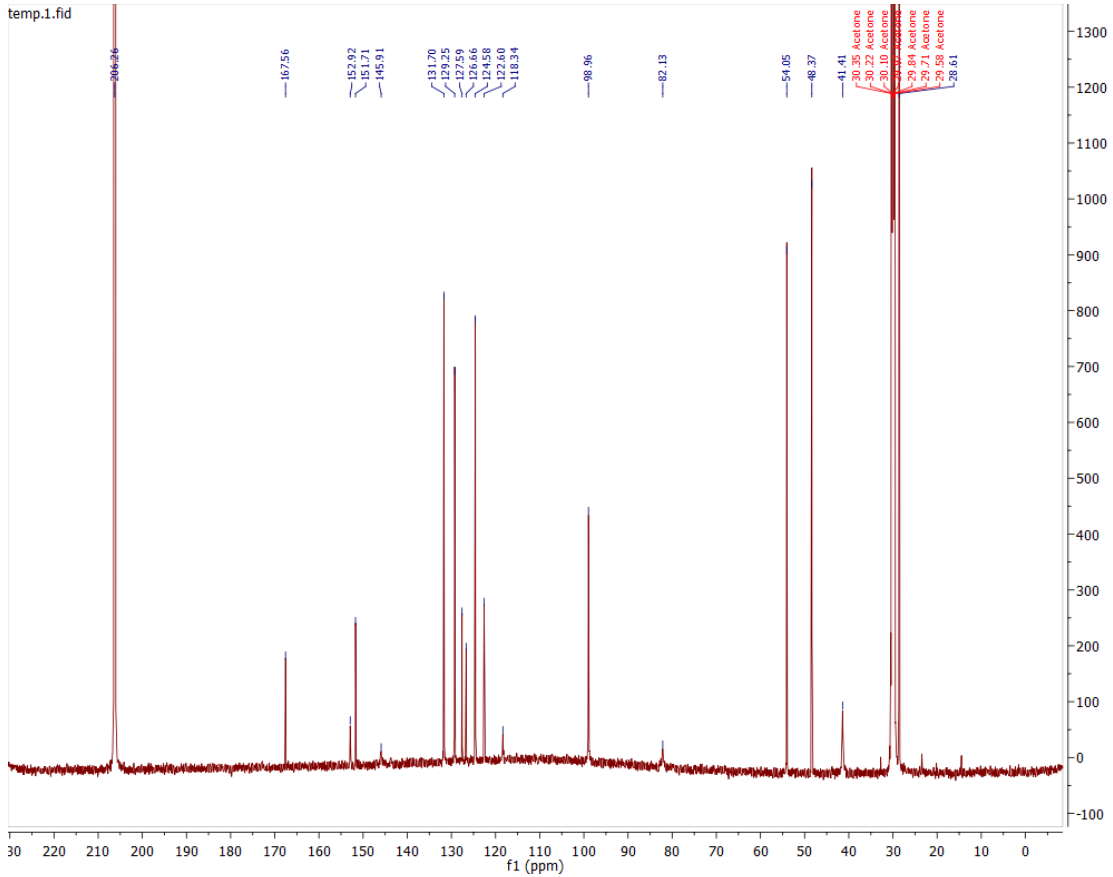

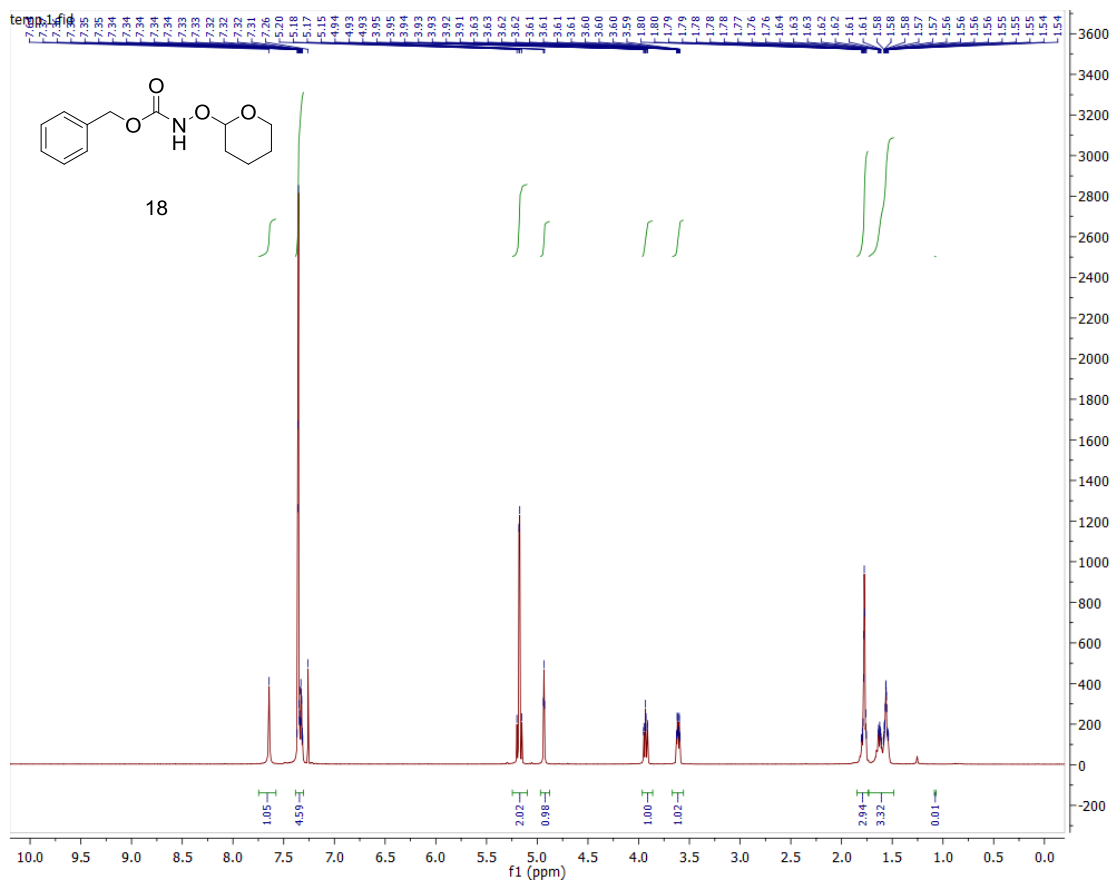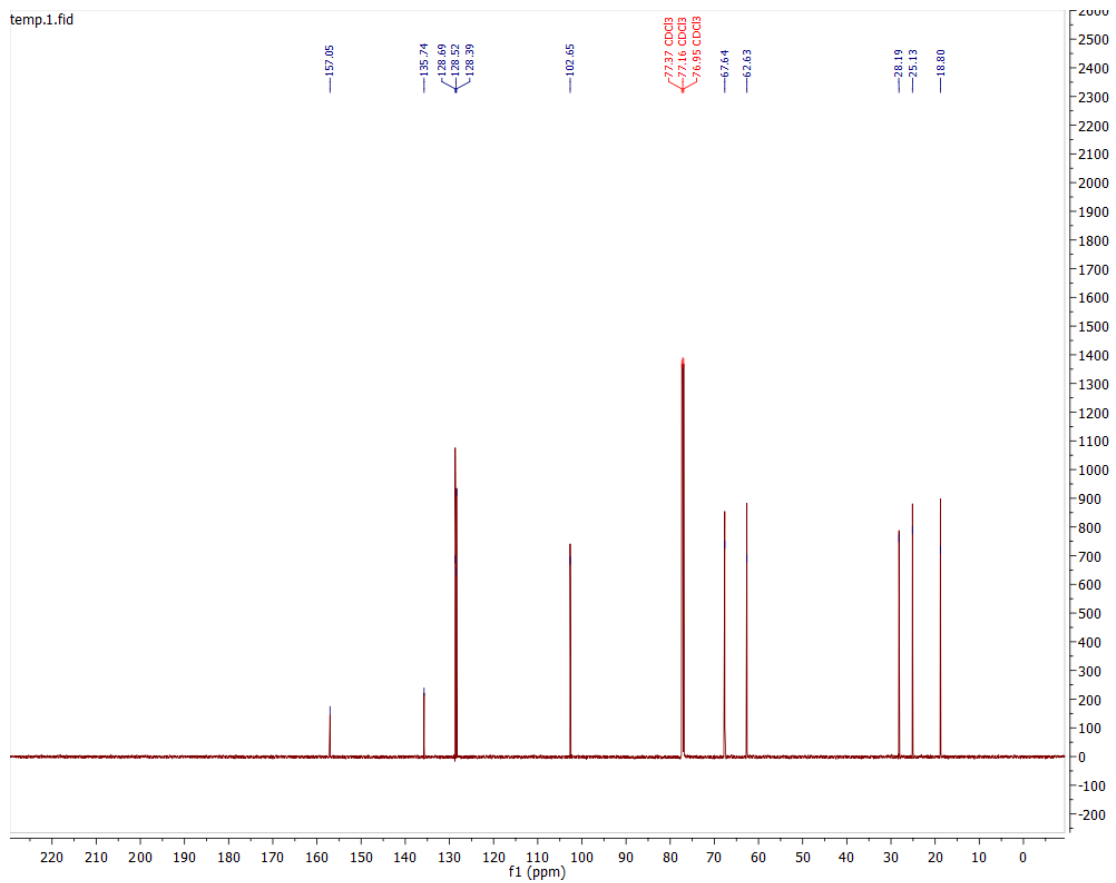

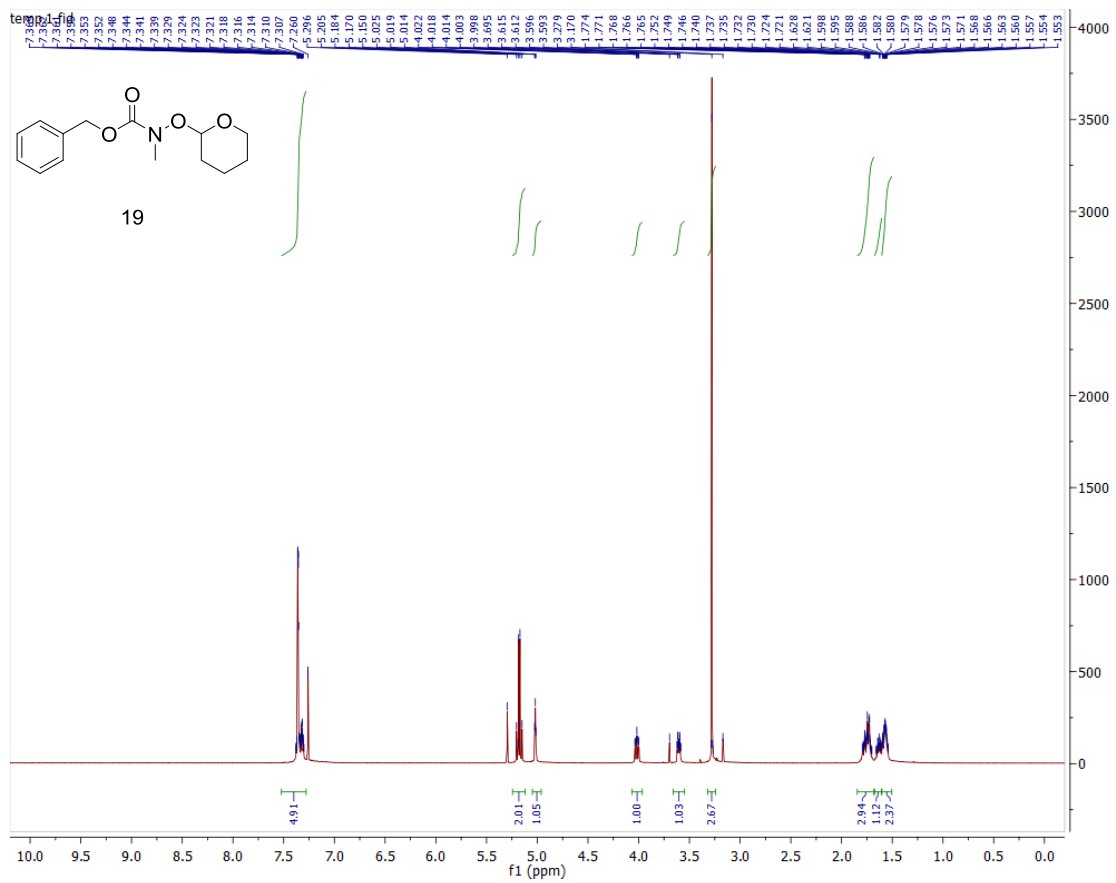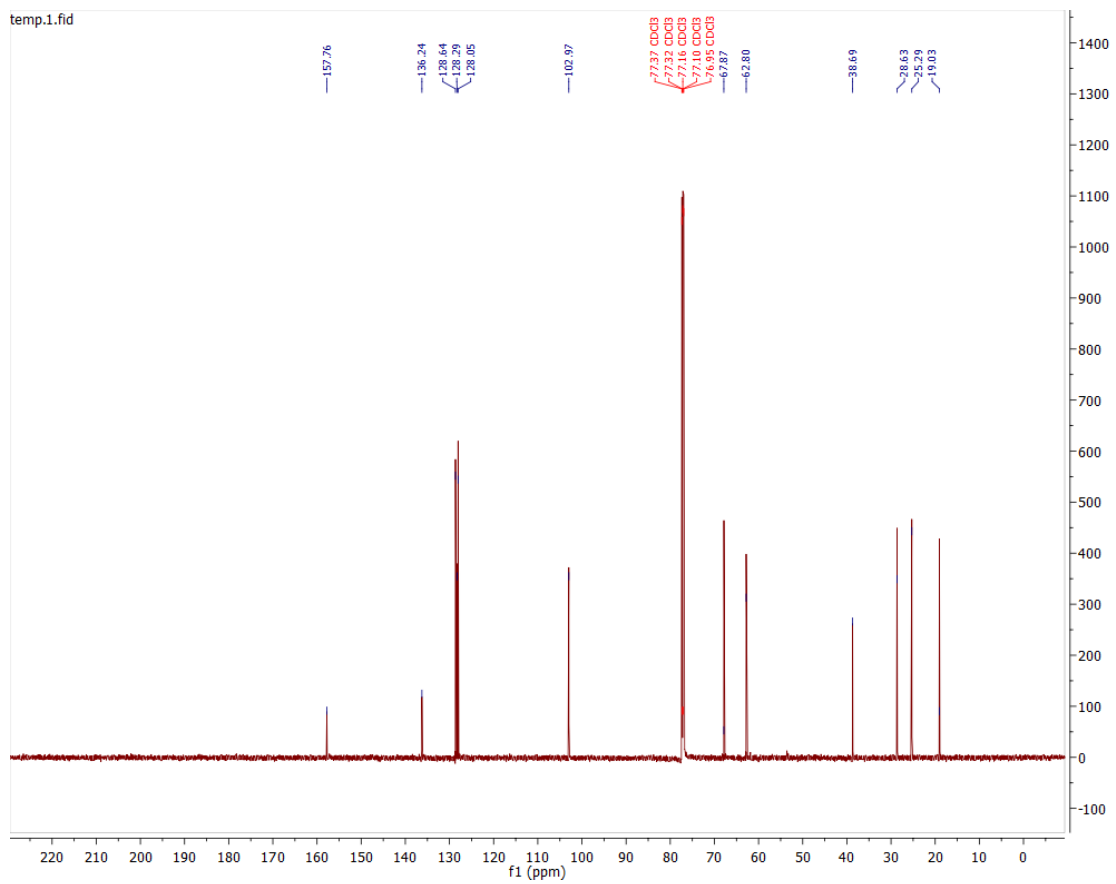

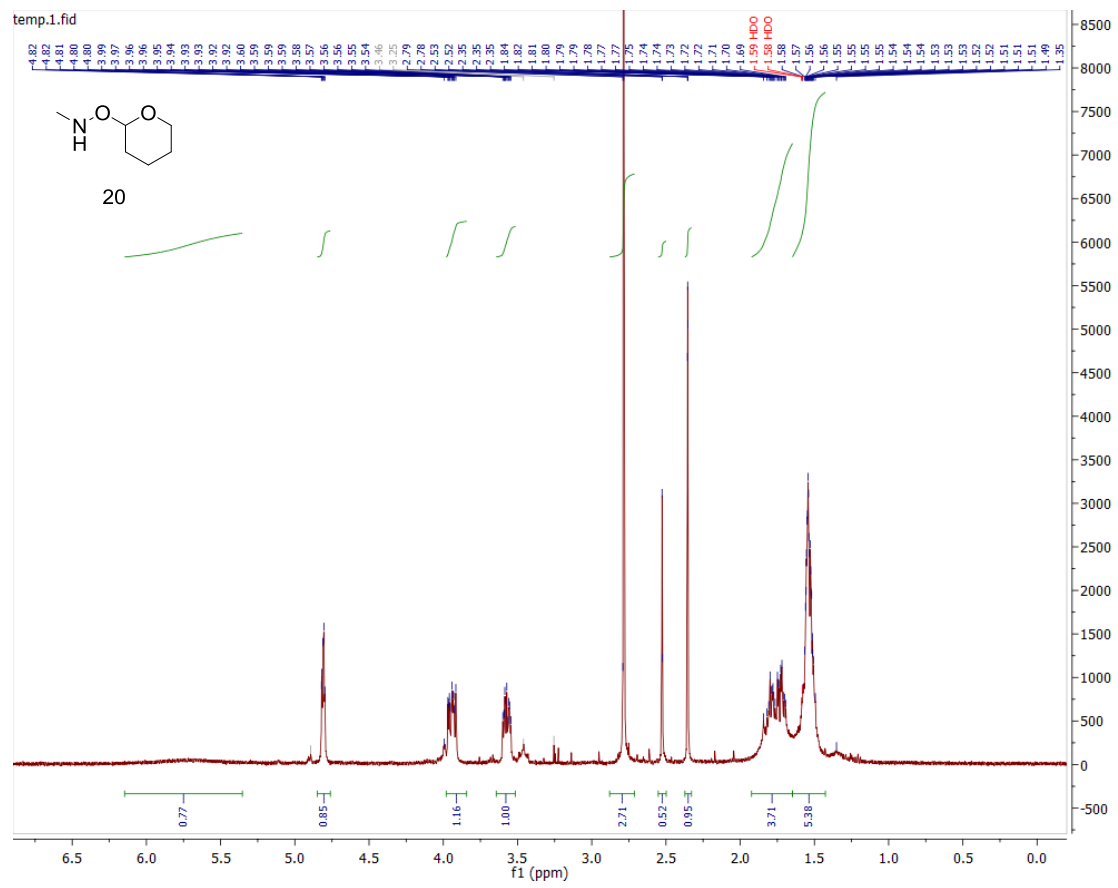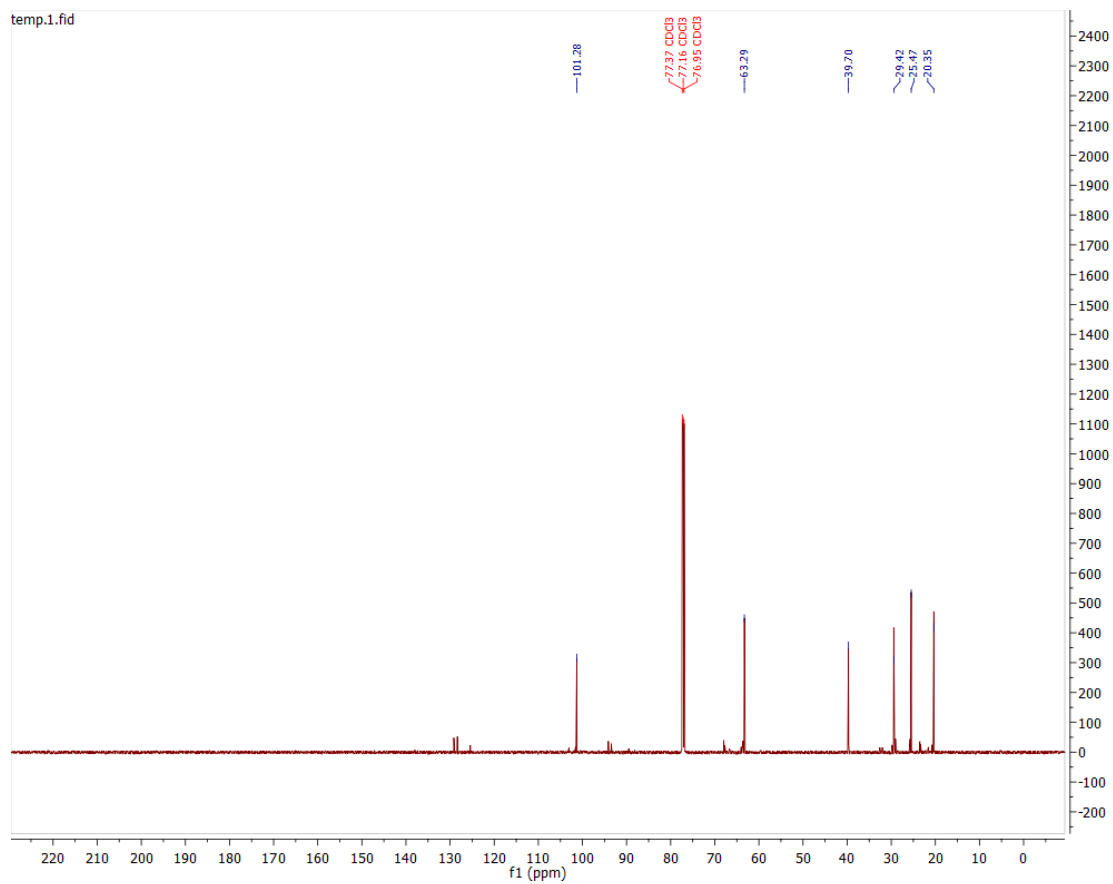



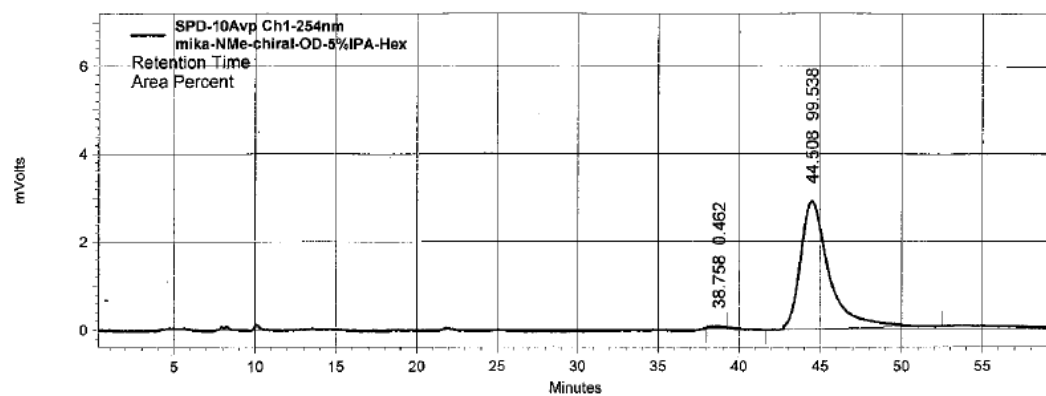

— C:\EZStart\Projects\Default\alwolfe\mika-NMe-chiral-OD-5%IPA-Hex, SPD-10Avp Ch1-254nm

**Figure S1.** Chromatographic separation of the enantiomers of **14** (Chiralcel OD column, 0.46 x 15 cm, 5% *i*-PrOH/hexane,  $\alpha = 1.15$ ) indicating the enantiopurity of the sample (99% ee).
